# Supplementary material for: Oncolytic H-1 Parvovirus Hijacks Galectin-1 to Enter Cancer Cells
Source: MDPI journal article supplement (doi:10.3390/v14051018), 2022-05-11
Supplement: s1 [file s1]

Oncolytic H-1 Parvovirus Hijacks Galectin-1 to Enter Cancer Cells

Supplementary Figures

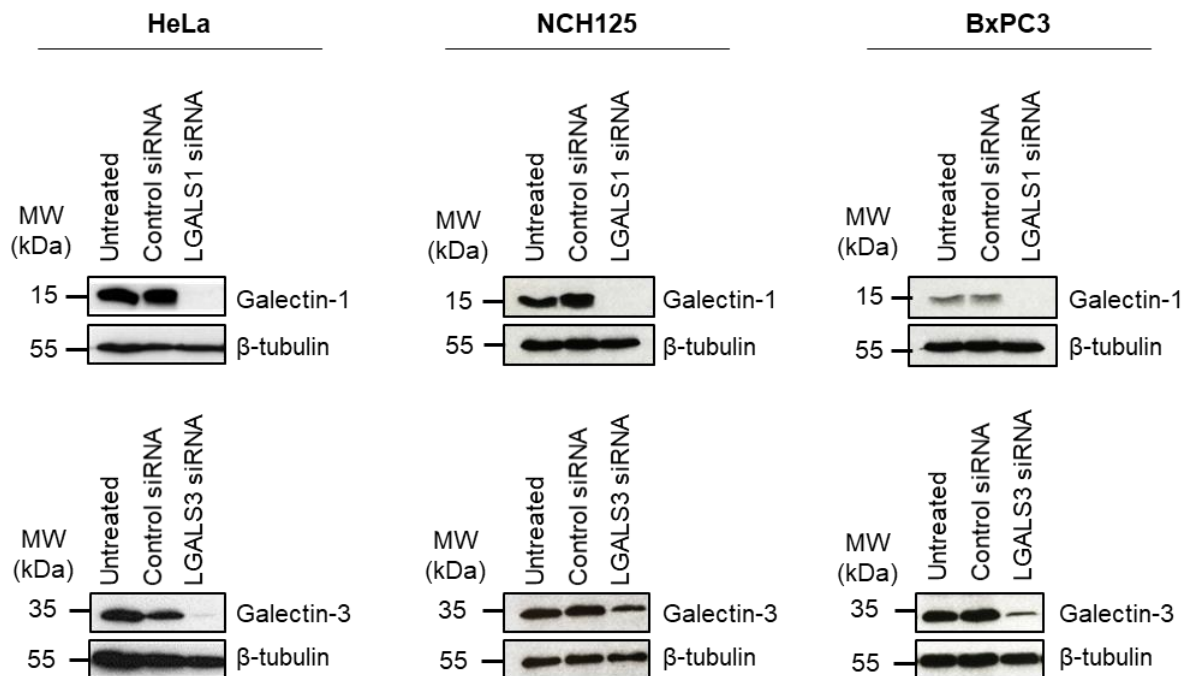

**Figure S1.** LGALS1 and LGALS3 knockdown in HeLa, NCH125 and BxPC3 cell lines. HeLa, NCH125 and BxPC3 cells were transfected with siRNAs targeting *LGALS1* or *LGALS3* or with a scrambled siRNA. At 48 hours post-transfection, the protein levels of Gal-1 and Gal-3 on cell lysates were analysed by Western blotting. Beta-tubulin was used as a loading control.

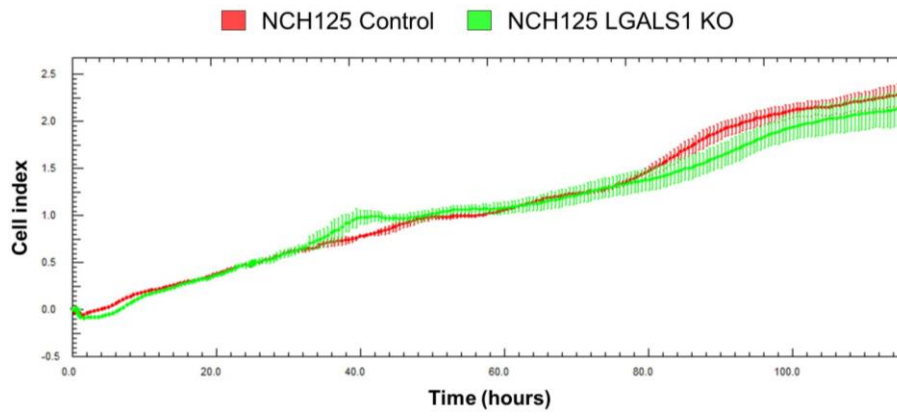

**Figure S2.** Cell proliferation of NCH125 Control *versus* NCH125 LGALS1 KO. NCH125 Control and LGALS1 KO cells were seeded in a 96-well E-plate and grown for five days. Cell proliferation was monitored with the xCELLigence System. Curves represent the mean Cell Index  $\pm$  standard deviation ( $n=3$ ).

**A**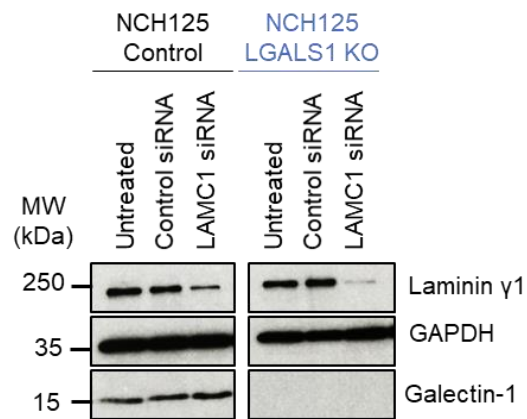**B**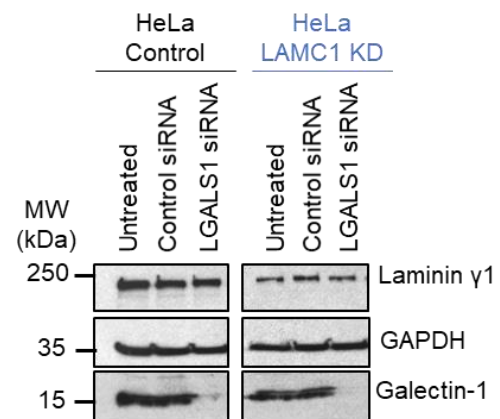

**Figure S3.** Depletion of both *LAMC1* and *LGALS1* in NCH125 and HeLa cells. **(A)** NCH125 Control and *LGALS1* KO cells were transfected with a siRNA targeting *LAMC1* or a negative control siRNA. **(B)** HeLa Control and HeLa *LAMC1* KD cells were transfected with a siRNA targeting *LGALS1* or a negative control siRNA. At 48 hours post-transfection, the protein levels of laminin  $\gamma$ 1 and Gal-1 on cell lysates were analysed by Western blotting. GAPDH was used as a loading control.

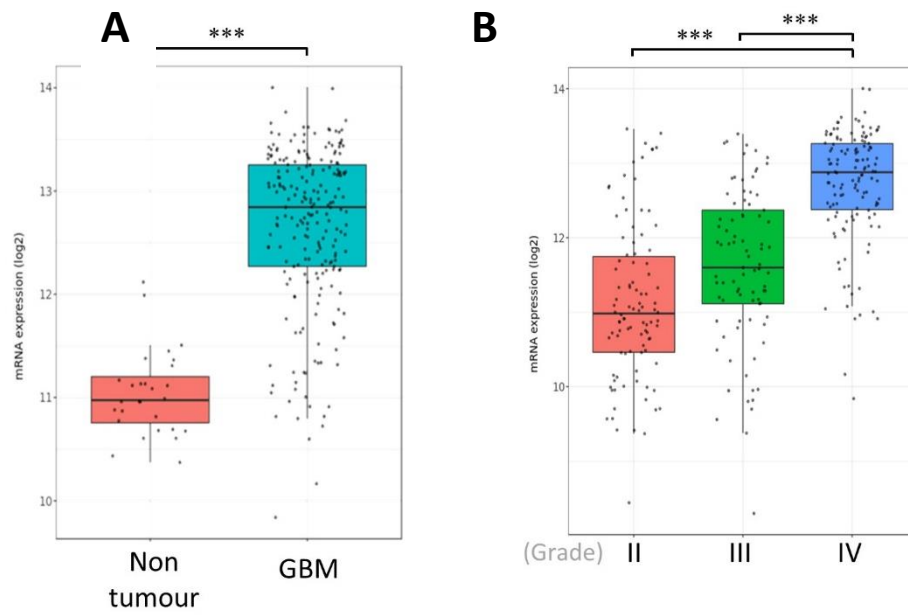

**Figure S4.** *LGALS1* overexpression in high-grade GBM. Analysis of *LGALS1* expression retrieved from the REMBRANDT dataset using the GlioVis portal. **(A)** Comparison based on histology, namely non-tumour *versus* glioblastoma multiforme (GBM). **(B)** Comparison based on WHO grade II, III and IV gliomas. Statistical significance was assessed by Tukey's honestly significant difference test (\*\*\*) ( $p < 0.001$ ).

Kaplan-Meier estimator  
survival analysis in **glioma**

Kaplan-Meier estimator  
survival analysis in **GBM**

Rembrandt dataset

Histology: All; Subtype: All; Cutoff: median

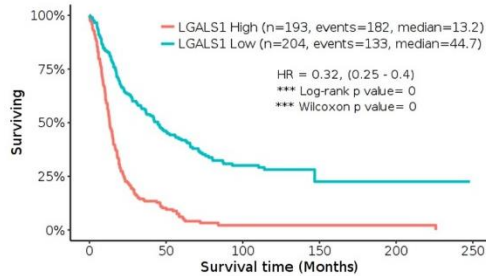

Histology: GBM; Subtype: All; Cutoff: median

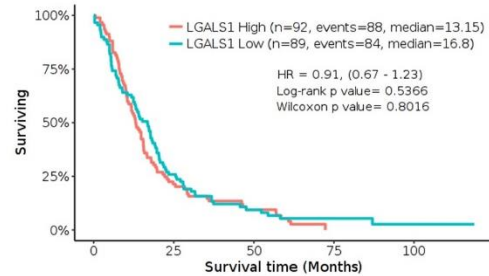

Gravendeel dataset

Histology: All; Subtype: All; Cutoff: median

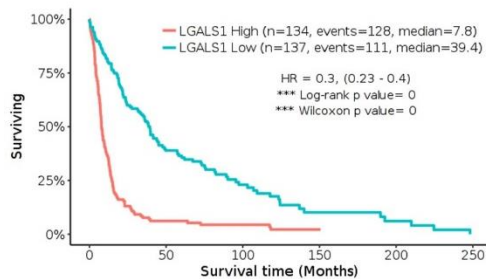

Histology: GBM; Subtype: Proneural; Cutoff: median

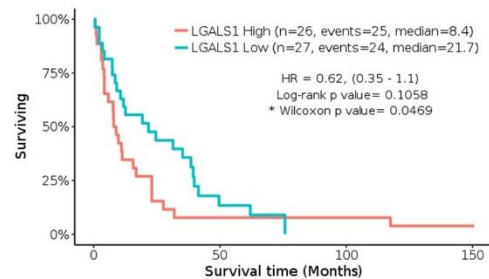

TCGA\_GBMLGG dataset

Histology: All; Subtype: All; Cutoff: median

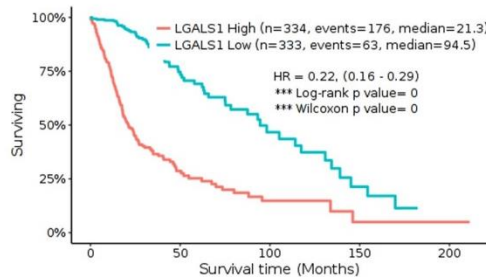

Histology: GBM; Subtype: All; Cutoff: median

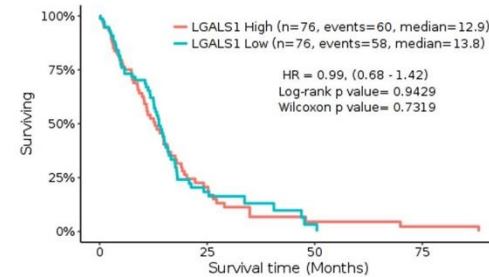

**Figure S5.** Higher levels of *LGALS1* are associated with poor prognosis in glioma. Kaplan-Meier survival curves for patients with glioma or glioblastoma (GBM) are divided into two groups based on *LGALS1* expression. Analysis was retrieved from the Rembrandt, Gravendeel and TCGA\_GBMLGG datasets using the GlioVis portal. The number of patients in each group and the log-rank *p* value are indicated. HR: hazard ration.

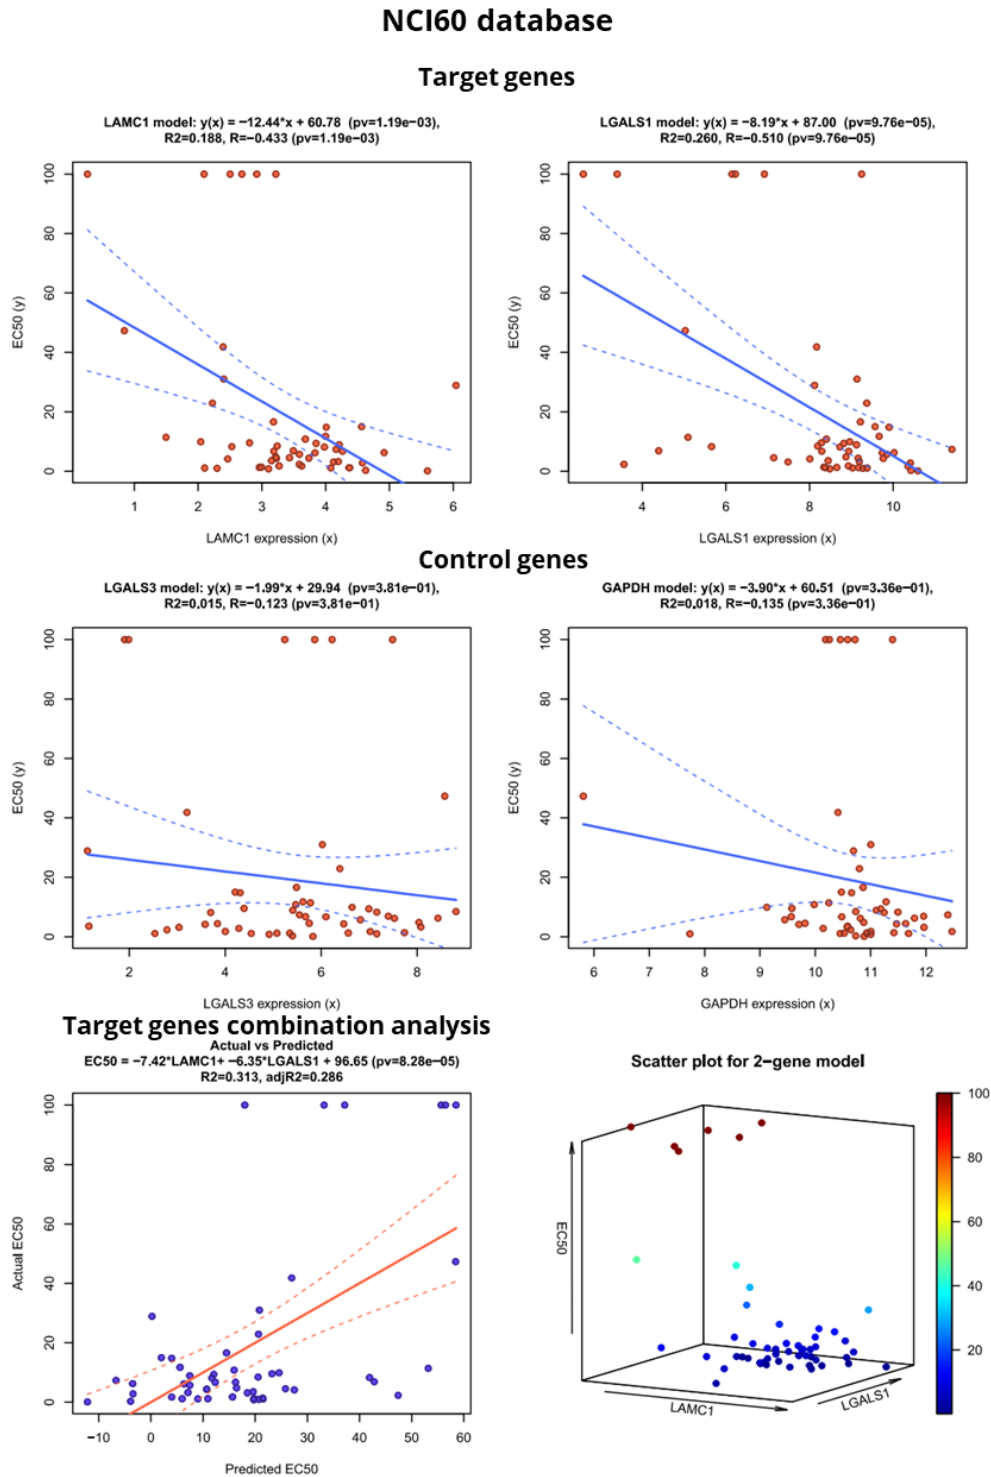

**Figure S6.** NCI60 database retrieved *LGALS1* and *LAMC1* expression levels showed anti-correlation with EC50 values and a slight increase in the ability to predict susceptibility to H-1PV induced oncotoxicity. Top plots show single-gene scatter plots with a linear model (dotted line – 95% C.I.) for the genes of interest. Middle plots – same for the control genes. Bottom left plot – comparison of the predictions by the two-gene model with experimental EC50 values. Bottom right – scatter plot in 3 dimensions (genes of interest and EC50).

## CCLE database

### Target genes

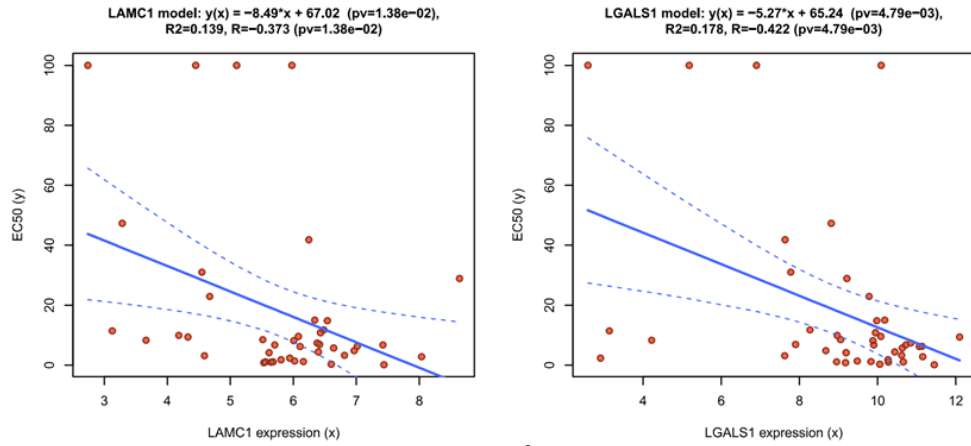

### Control genes

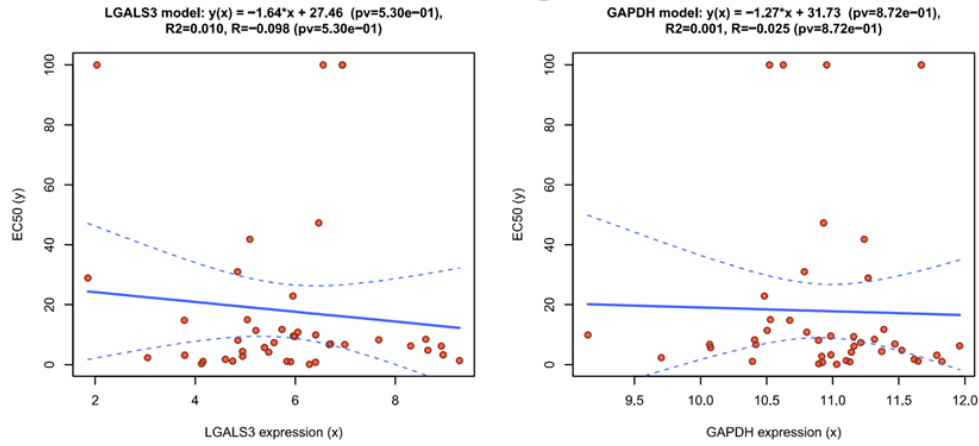

### Target genes combination analysis

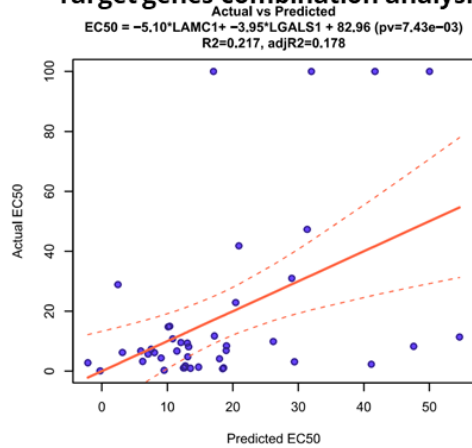

### Scatter plot for 2-gene model

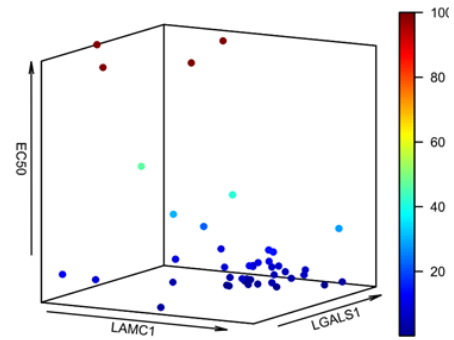

**Figure S7.** CCLE database retrieved *LGALS1* and *LAMC1* expression levels showed anti-correlation with EC50 values and shows a slight increase in the ability to predict susceptibility to H-1PV induced oncotoxicity. Top plots show single-gene scatter plots with a linear model (dotted line – 95% C.I.) for the genes of interest. Middle plots – same for the control genes. Bottom left plot – comparison of the predictions by the two-gene model with experimental EC50 values. Bottom right – scatter plot in 3 dimensions (genes of interest and EC50).
